# Supplementary material for: Misleading Advertising for Antidepressants in Sweden: A Failure of Pharmaceutical Industry Self-Regulation
Source: PubMed Central journal article supplement (PMC3641086; doi:10.1371/journal.pone.0062609), 2013-05-01
Supplement: pone.0062609.s002.pdf [file pone.0062609.s002.pdf]

**Table S1. Compiled data on IGM/NBL cases.**

| Case no.                 | Product   | Instigator           | Sanctioned company | Ruling date | First ad <sup>1</sup> | Last ad <sup>1</sup> | Fines (SEK)  | Unique ads <sup>2</sup> | Total ads <sup>2</sup> | Violated article(s) <sup>3</sup> |
|--------------------------|-----------|----------------------|--------------------|-------------|-----------------------|----------------------|--------------|-------------------------|------------------------|----------------------------------|
| IGM B005/94              | Seroxat   | IGM                  | Novo Nordisk       | 1994-10-01  | 1994; 35              | 1994; 39             | 10000        | 1                       | 3                      | 4                                |
| IGM B019/94              | Seroxat   | IGM                  | Novo Nordisk       | 1994-12-12  | 1994; 41              | 1994; 45             | 10000        | 1                       | 3                      | 4; 12                            |
| IGM B030/95              | Seroxat   | Lundbeck             | Novo Nordisk       | 1995-07-03  | 1995; 21              | 1995; 21             | 10000        | 1                       | 1                      | 1; 4; 12                         |
| NBL 421/95               |           |                      |                    | 1995-09-29  |                       |                      | 50000        |                         |                        |                                  |
| IGM B029/95 <sup>4</sup> | Cipramil  | IGM                  | Lundbeck           | 1995-06-04  | 1994; 8               | 1997; 10             | 10000        | 7                       | 32                     | 1; 4                             |
| NBL 422/95 <sup>4</sup>  |           |                      |                    | 1995-10-20  |                       |                      | 10000        |                         |                        |                                  |
| IGM L026/95              | Zoloft    | IGM                  | Pfizer             | 1995-05-28  | 1995; 7               | 1995; 17             | 10000        | 1                       | 9                      | 1; 4; 11                         |
| IGM B032/95              | Seroxat   | IGM                  | Novo Nordisk       | 1995-06-11  | 1995; 23              | 1995; 23             | 10000        | 1                       | 1                      | 18                               |
| IGM B048/95              | Fontex    | IGM                  | Eli Lilly          | 1995-11-27  | 1995; 40              | 1995; 49             | 10000        | 5                       | 7                      | 3; 4; 8; 11                      |
| IGM L004/96              | Cipramil  | IGM                  | Lundbeck           | 1996-02-23  | 1996; 4               | 1996; 4              | 25000        | 1                       | 1                      | 4; 8; 11                         |
| IGM B048/96              | Fevarin   | IGM                  | Meda AB            | 1996-08-07  | 1996; 26-27           | 1996; 26-27          | 15000        | 1                       | 1                      | 4                                |
| IGM B059/96              | Cipramil  | IGM                  | Lundbeck           | 1996-07-07  | 1995; 50              | 1996; 47             | 25000        | 3                       | 10                     | 4                                |
| IGM L030/96              | Effexor   | IGM                  | Wyeth              | 1996-05-17  | 1996; 17              | 1996; 23             | 25000        | 2                       | 6                      | 4; 11                            |
| IGM B038/97 <sup>4</sup> | Cipramil  | Novo Nordisk         | Lundbeck           | 1997-07-13  | 1997; 12              | 1997; 41             | 25000        | 1                       | 14                     | 4; 8                             |
| NBL 460/97 <sup>4</sup>  |           |                      |                    | 1997-10-07  |                       |                      | No extra fee |                         |                        |                                  |
| IGM W030/97              | Cipramil  | Novo Nordisk         | Lundbeck           | 1997-10-19  | 1996; 3               | 1997; 43             | 50000        | 4                       | 28                     | 12                               |
| NBL 465/97               |           |                      |                    | 1997-12-18  |                       |                      | 50000        |                         |                        |                                  |
| IGM B041/97              | Fontex    | IGM                  | Eli Lilly          | 1997-07-27  | 1997; 30-31           | 1997; 30-31          | 25000        | 1                       | 1                      | 4; 11                            |
| IGM W110/98              | Cipramil  | IGM                  | Lundbeck           | 1998-10-14  | 1998; 18              | 1998; 45             | 50000        | 1                       | 15                     | 4; 11                            |
| NBL 496/98               |           |                      |                    | 1998-12-21  |                       |                      | 50000        |                         |                        |                                  |
| IGM W119/98 <sup>4</sup> | Effexor   | Health Prof.         | Wyeth              | 1998-11-30  | 1998; 3               | 1999; 11             | 50000        | 4                       | 24                     | 10; 11                           |
| IGM W221/00              | Seroxat   | Wyeth                | SmithKleinB        | 2000-03-20  | 1999; 6               | 2000; 14             | 50000        | 6                       | 13                     | 2; 4                             |
| NBL 542/00               |           |                      |                    | 2000-07-12  |                       |                      | 50000        |                         |                        |                                  |
| IGM W224/00              | Effexor   | SmithKleinB          | Wyeth              | 2000-04-29  | 1999; 21              | 2000; 8              | 50000        | 2                       | 6                      | 4                                |
| IGM W293/00              | Zoloft    | Health Professionals | Pfizer             | Not avail.  | 2000; 48              | 2001; 24             | No violation | 1                       | 19                     | 4                                |
| NBL 574/01               |           |                      |                    | 2001-07-20  |                       |                      | 50000        |                         |                        |                                  |
| IGM W448/02              | Remeron   | Health Prof          | Organon            | 2002-10-30  | 1998; 36              | 2002; 41             | 60000        | 3                       | 44                     | 4                                |
| IGM W478/02 <sup>5</sup> | Cipralext | Wyeth                | Lundbeck           | 2003-01-19  | 2002; 44              | 2002; 52             | 60000        | 1                       | 6                      | 2; 4                             |
| NBL 626/02               | Cipralext | MPA                  | Lundbeck           | 2003-04-04  | 2002; 22              | 2002; 43             | 60000        | 2                       | 10                     | 4; 12                            |
| IGM W502/03 <sup>5</sup> | Cipralext | Wyeth                | Lundbeck           | 2003-04-07  | 2003; 5               | 2003; 10             | 60000        | 2                       | 5                      | 2; 4                             |

<sup>1</sup>Year and issue (week) of the journal is indicated.

<sup>2</sup>A few advertisements had contents ruled in violation in multiple cases.

<sup>3</sup>For a few cases not all article violations specified in the case report applied to all advertisements encompassed by the ruling.

<sup>4</sup>Cases where the company ignored the IGM/NBL request to stop disseminating violative advertisements.

<sup>5</sup>Cases of repeat violations, i.e. similar violative claims for the same drug in more than ruling.
